# Supplementary material for: Diversity and Relationships among Neglected Apricot (Prunus armeniaca L.) Landraces Using Morphological Traits and SSR Markers: Implications for Agro-Biodiversity Conservation
Source: MDPI journal article supplement (doi:10.3390/plants10071341), 2021-06-30
Supplement: s1 [file s1]

Supplementary Table S3: SSR loci employed, primer sequences (in 5' to 3' order), and their main features.

| Locus    | Forward                  | Reverse                  | Core motif | Ta (°C) | Allelic size range (bp) | Reference |
|----------|--------------------------|--------------------------|------------|---------|-------------------------|-----------|
| AMPA095  | GCCAAAGTTAGGAAGGAGAATG   | TTCATATTCAAACCCAATGAC    | (AC)       | 56      | 79-87                   | [28]      |
| AMPA112  | CAAAGTGTCATTGTTCTTGCTAG  | AAGGCCAAAACCTCCAGTAGAAG  | (AG)       | 55      | 206-236                 | [28]      |
| AMPA111  | ACTGACAGCAGCAGAATGTGTC   | TATCATCAGGGCTTTTGTGTG    | (CTT)      | 55      | 171-207                 | [28]      |
| AMPA113  | CAACTCTGGTTTTCTGTCTCTC   | CCTTCAGACTAGCTGAGCTTCC   | (CT)       | 55      | 116-152                 | [28]      |
| AMPA124  | TCAACCTGTAATAACCTAGCTTGC | AGCCGATGACTTGATTTTCCTC   | (GA)       | 55      | 152-174                 | [28]      |
| UDAp-401 | AAACCCTAGCCGCCATAACT     | GCTAAAGGCCTCCGATACC      | (TC)       | 56      | 152-176                 | [29]      |
| UDAp-410 | TTGTTGACAAGAAGAAAACAAAGC | CAACGGGTTGGTTTCAGAAG     | (AG)       | 56      | 168-184                 | [29]      |
| UDAp-414 | CAAGCACAAGCGAACAAAAT     | GGTGGTTTCTTATCCGATGC     | (AG)       | 56      | 130-164                 | [29]      |
| UDAp-415 | AACTGATGAGAAGGGGCTTG     | ACTCCCGACATTTGTGCTTC     | (GA)       | 56      | 297-300                 | [29]      |
| UDAP-419 | TTCTTTTGGGATTGGTCTCG     | GATTTTAAATAACCAACCAGCTTC | (GA)       | 56      | 135-149                 | [29]      |
| UDAp-420 | TTCCTTGCTTCCCTTCATTG     | CCCAGAACTTGATTCTGACCA    | (CT)       | 56      | 96-140                  | [29]      |
| UDAp-446 | CCTCCCCTAGATTTTCAGC      | CGTGCTTGGGACATAGATCA     | (GA)       | 54      | 150-180                 | [19]      |

Ta: temperature of annealing
