# Supplementary material for: Diversity and Relationships among Neglected Apricot (Prunus armeniaca L.) Landraces Using Morphological Traits and SSR Markers: Implications for Agro-Biodiversity Conservation
Source: MDPI journal article supplement (doi:10.3390/plants10071341), 2021-06-30
Supplement: s1 [file s1]

Supplementary Table S1: Phenotypic traits analysis. The full name of the variety is reported in the main body of the article.

| Variety<br>(code) | Fruit<br>fresh<br>weight<br>(g/fruit) | Fruit<br>length<br>(mm) | Fruit<br>width<br>(mm) | Fruit<br>volume<br>(cm <sup>3</sup> ) | Solid<br>Soluble<br>Content<br>(°Brix) | Titrateable<br>acidity<br>(g/L) | Flesh<br>firmness<br>(N) | Tree:<br>vigour | Fruit:<br>ground<br>colour of skin | Fruit:<br>colour of flesh | Kernel:<br>bitterness | Fruit:<br>adherence of stone to<br>flesh |
|-------------------|---------------------------------------|-------------------------|------------------------|---------------------------------------|----------------------------------------|---------------------------------|--------------------------|-----------------|------------------------------------|---------------------------|-----------------------|------------------------------------------|
| ANT               | 54.5                                  | 53.7                    | 45.8                   | 34.34                                 | 15.5                                   | 1.20                            | 34.34                    | strong          | yellowish                          | light orange              | present               | absent or very weak                      |
| ARO               | 47.1                                  | 41.5                    | 40.1                   | 41.20                                 | 18.3                                   | 1.04                            | 41.20                    | very strong     | yellowish                          | cream                     | present               | absent or very weak                      |
| BOC               | 40.5                                  | 43.7                    | 38.1                   | 52.68                                 | 16.1                                   | 1.44                            | 52.68                    | strong          | yellowish                          | dark orange               | present               | absent or very weak                      |
| CAF               | 53.0                                  | 44.6                    | 44.2                   | 38.26                                 | 15.9                                   | 1.34                            | 38.26                    | strong          | yellowish                          | cream                     | present               | present                                  |
| DIA               | 34.9                                  | 39.7                    | 36.1                   | 19.62                                 | 17.5                                   | 1.04                            | 19.62                    | NA              | light orange                       | light orange              | present               | absent or very weak                      |
| DON               | 62.3                                  | 44.9                    | 44.8                   | 24.53                                 | 13.1                                   | 2.48                            | 24.53                    | strong          | light orange                       | medium orange             | present               | absent or very weak                      |
| MAG               | 46.4                                  | 45.1                    | 40.9                   | 24.53                                 | 19.7                                   | 0.71                            | 24.53                    | medium          | yellowish                          | light orange              | present               | absent or very weak                      |
| MAM               | 37.9                                  | 38.2                    | 38.4                   | 34.04                                 | 16.57                                  | 1.41                            | 34.04                    | strong          | light orange                       | cream                     | present               | absent or very weak                      |
| MON               | 61.5                                  | 49.8                    | 45.9                   | 19.62                                 | 16.62                                  | 0.85                            | 19.62                    | strong          | yellowish                          | light orange              | present               | absent or very weak                      |
| NON               | 44.1                                  | 42.9                    | 39.0                   | 17.66                                 | 16.88                                  | 0.95                            | 17.66                    | strong          | light orange                       | light orange              | present               | absent or very weak                      |
| PAN               | 45.3                                  | 45.3                    | 40.5                   | 27.47                                 | 18.5                                   | 1.12                            | 27.47                    | strong          | yellowish                          | medium orange             | present               | absent or very weak                      |
| PAO               | 51.0                                  | 50.8                    | 42.8                   | 44.15                                 | 17.5                                   | 1.43                            | 44.15                    | weak            | yellowish                          | light orange              | present               | absent or very weak                      |
| PAZ               | 50.6                                  | 47.0                    | 44.8                   | 53.96                                 | 10.9                                   | 1.05                            | 53.96                    | very strong     | yellowish                          | medium orange             | present               | absent or very weak                      |
| PEL               | 36.3                                  | 39.9                    | 34.9                   | 26.49                                 | 14.8                                   | 1.55                            | 26.49                    | strong          | yellowish                          | dark orange               | present               | absent or very weak                      |
| POR               | 49.9                                  | 44.5                    | 43.9                   | 20.60                                 | 20.6                                   | 0.45                            | 20.60                    | NA              | light orange                       | light orange              | present               | absent or very weak                      |
| PRE               | 46.4                                  | 45.5                    | 39.4                   | 18.64                                 | 12.6                                   | NA                              | 18.64                    | medium          | light orange                       | cream                     | present               | absent or very weak                      |
| RES               | 56.3                                  | 43.8                    | 42.6                   | 18.34                                 | 22.7                                   | 0.46                            | 18.34                    | strong          | light orange                       | light orange              | present               | absent or very weak                      |
| SAG               | 38.3                                  | 42.3                    | 36.7                   | 22.56                                 | 19.1                                   | 1.08                            | 22.56                    | strong          | yellowish                          | cream                     | present               | absent or very weak                      |
| SAN               | 30.0                                  | 39.0                    | 35.2                   | 21.58                                 | 11.7                                   | 2.16                            | 21.58                    | strong          | yellowish                          | cream                     | present               | absent or very weak                      |
| SCA               | 55.5                                  | 50.8                    | 44.8                   | 33.35                                 | 17.6                                   | 1.44                            | 33.35                    | strong          | yellowish                          | light orange              | absent or weak        | absent or very weak                      |
| SCH               | 47.7                                  | 53.7                    | 47.3                   | 36.30                                 | 10.4                                   | 1.21                            | 36.30                    | strong          | yellowish                          | medium orange             | present               | absent or very weak                      |
| SCI               | 43.9                                  | 44.7                    | 41.1                   | 20.60                                 | 18.7                                   | 0.64                            | 20.60                    | NA              | light orange                       | light orange              | present               | absent or very weak                      |
| SON               | 32.9                                  | 39.4                    | 36.5                   | 24.53                                 | 12.7                                   | 2.16                            | 24.53                    | weak            | light orange                       | light orange              | present               | absent or very weak                      |
| SOR               | 50.6                                  | 47.4                    | 42.1                   | 23.54                                 | 12.9                                   | 1.44                            | 23.54                    | strong          | yellowish                          | light orange              | present               | absent or very weak                      |
| STE               | 37.1                                  | 42.2                    | 37.0                   | 28.45                                 | 12.8                                   | 1.15                            | 28.45                    | medium          | light orange                       | light orange              | present               | absent or very weak                      |

|     |      |      |      |       |       |      |       |             |           |               |         |                     |
|-----|------|------|------|-------|-------|------|-------|-------------|-----------|---------------|---------|---------------------|
| TAV | 59.6 | 51.8 | 46.2 | 32.37 | 15.7  | 1.42 | 32.37 | strong      | yellowish | medium orange | present | absent or very weak |
| VIC | 44.0 | 40.5 | 40.2 | 29.14 | 15.99 | 1.74 | 29.14 | very strong | yellowish | medium orange | present | absent or very weak |
| ZEP | 49.5 | 48.9 | 42.2 | 23.54 | 12.7  | 1.60 | 23.54 | strong      | yellowish | medium orange | present | absent or very weak |

---
